# Supplementary material for: Explaining classification performance and bias via network structure and sampling technique
Source: Springer Nature journal article supplement (doi:10.1007/s41109-021-00394-3), 2021-10-21
Supplement: MOESM1 [file 19783338]

### Appendix A: Supplementary Material

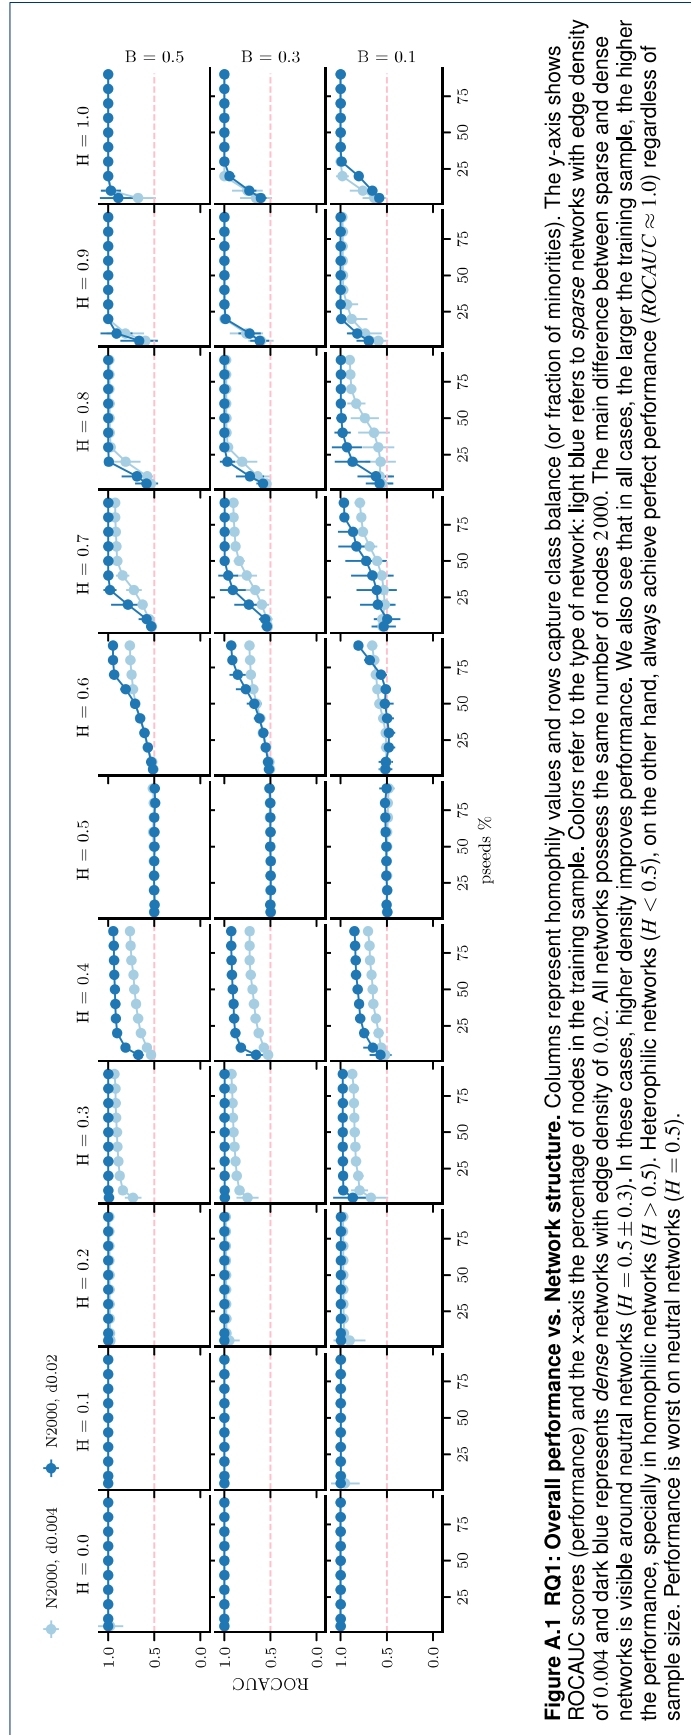

**Figure A.1 RQ1: Overall performance vs. Network structure.** Columns represent homophily values and rows capture class balance (or fraction of minorities). The y-axis shows ROC AUC scores (performance) and the x-axis the percentage of nodes in the training sample. Colors refer to the type of network: light blue refers to sparse networks with edge density of 0.004 and dark blue represents dense networks with edge density of 0.02. All networks possess the same number of nodes 2000. The main difference between sparse and dense networks is visible around neutral networks ( $H = 0.5 \pm 0.3$ ). In these cases, higher density improves performance. We also see that in all cases, the larger the training sample, the higher the performance, specially in homophilic networks ( $H > 0.5$ ). Heterophilic networks ( $H < 0.5$ ), on the other hand, always achieve perfect performance ( $ROC AUC \approx 1.0$ ) regardless of sample size. Performance is worst on neutral networks ( $H = 0.5$ ).

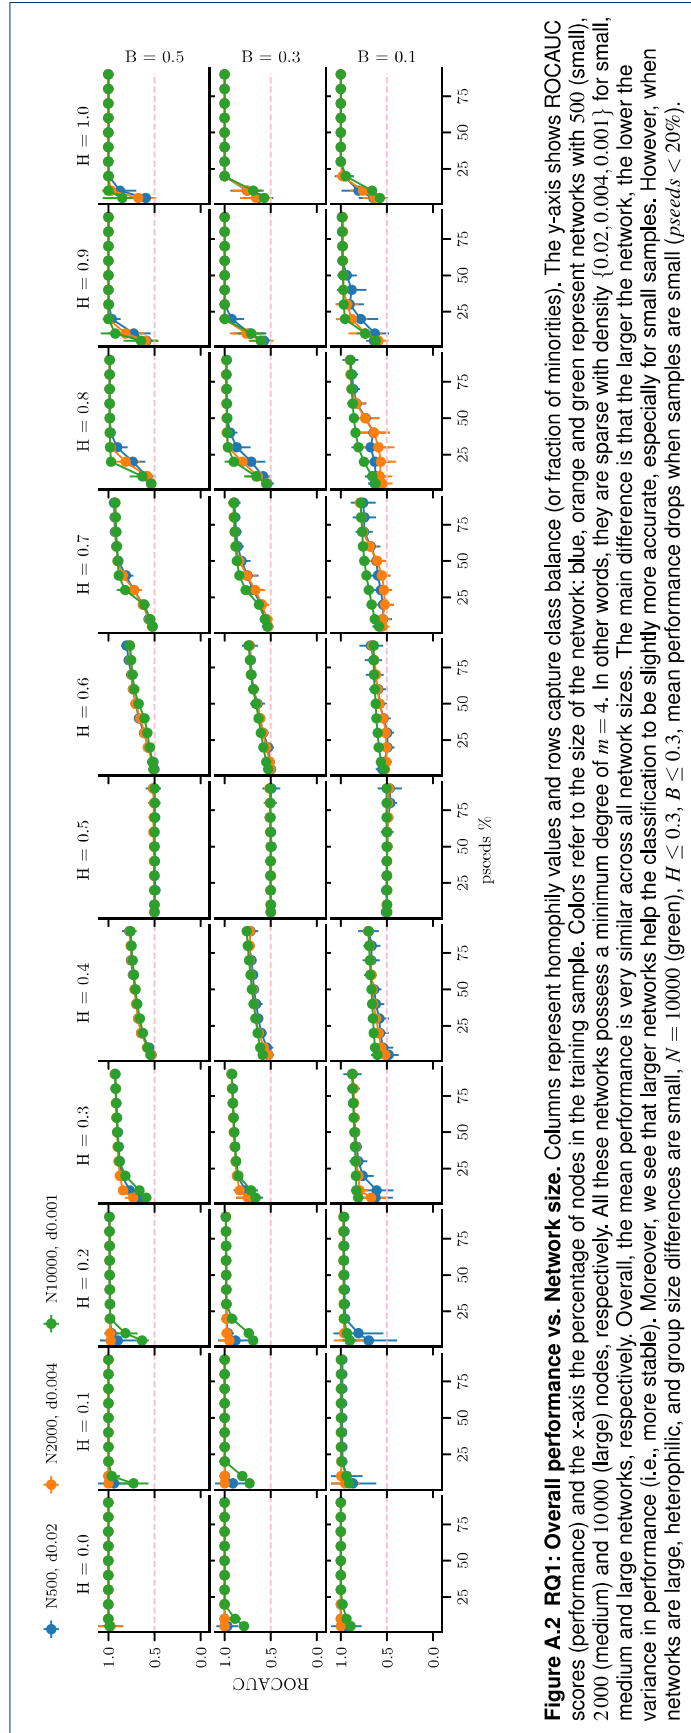

**Figure A.2 RQ1: Overall performance vs. Network size.** Columns represent homophily values and rows capture class balance (or fraction of minorities). The y-axis shows ROC AUC scores (performance) and the x-axis the percentage of nodes in the training sample. Colors refer to the size of the network: blue, orange and green represent networks with 500 (small), 2000 (medium) and 10000 (large) nodes, respectively. All these networks possess a minimum degree of  $m = 4$ . In other words, they are sparse with density  $\{0.02, 0.004, 0.001\}$  for small, medium and large networks, respectively. Overall, the mean performance is very similar across all network sizes. The main difference is that the larger the network, the lower the variance in performance (i.e., more stable). Moreover, we see that larger networks help the classification to be slightly more accurate, especially for small samples. However, when networks are large, heterophilic, and group size differences are small,  $N = 10000$  (green),  $H \leq 0.3$ ,  $B \leq 0.3$ , mean performance drops when samples are small ( $pseudocs < 20\%$ ).

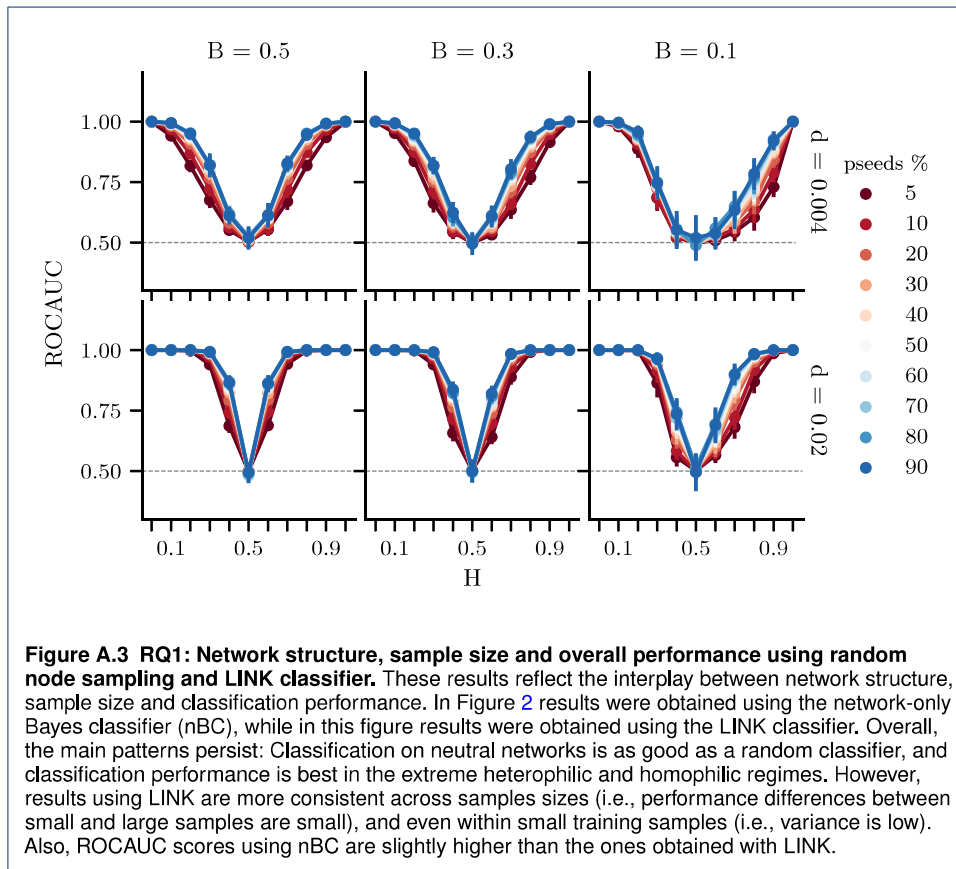

**Figure A.3 RQ1: Network structure, sample size and overall performance using random node sampling and LINK classifier.** These results reflect the interplay between network structure, sample size and classification performance. In Figure 2 results were obtained using the network-only Bayes classifier (nBC), while in this figure results were obtained using the LINK classifier. Overall, the main patterns persist: Classification on neutral networks is as good as a random classifier, and classification performance is best in the extreme heterophilic and homophilic regimes. However, results using LINK are more consistent across samples sizes (i.e., performance differences between small and large samples are small), and even within small training samples (i.e., variance is low). Also, ROCAUC scores using nBC are slightly higher than the ones obtained with LINK.

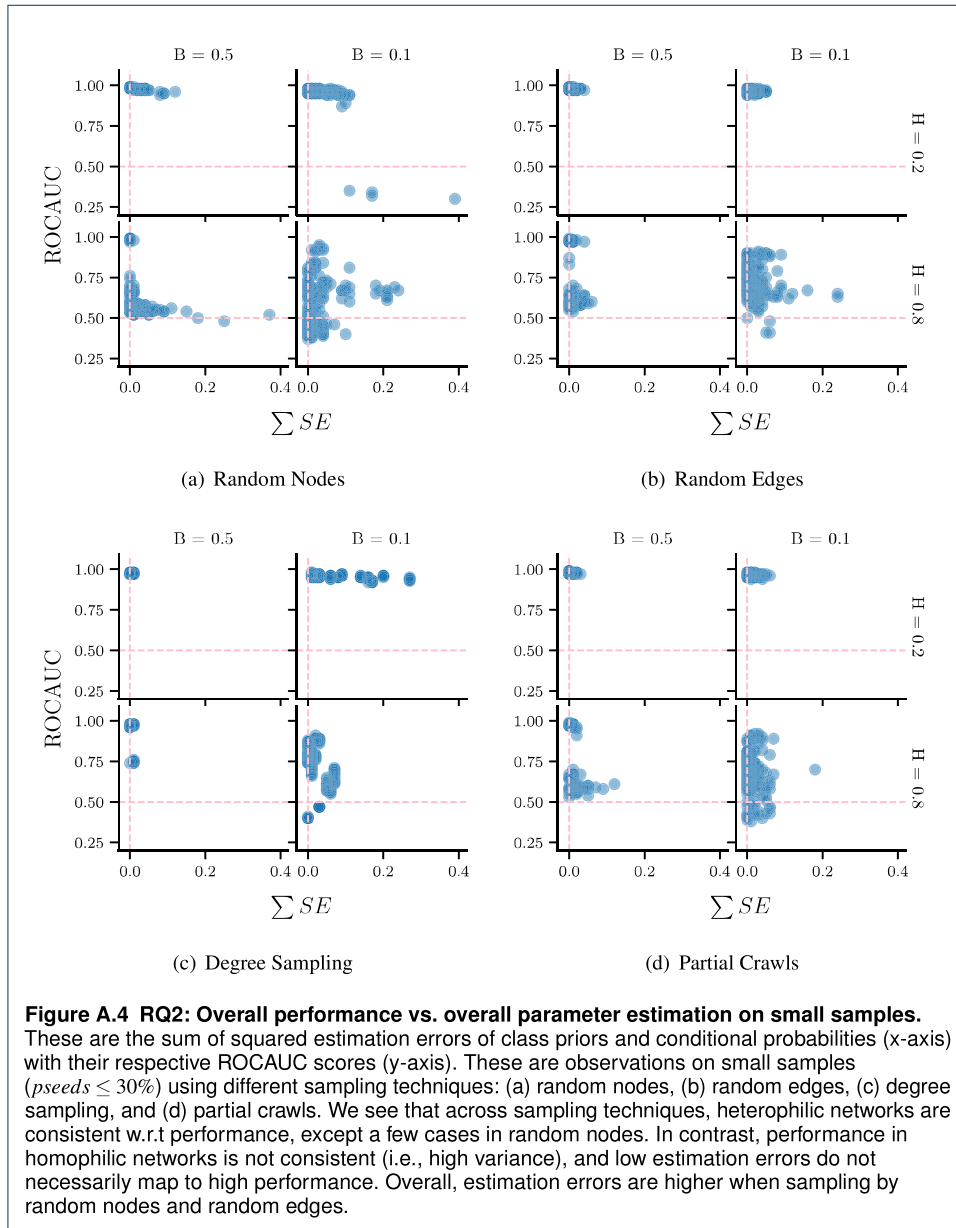

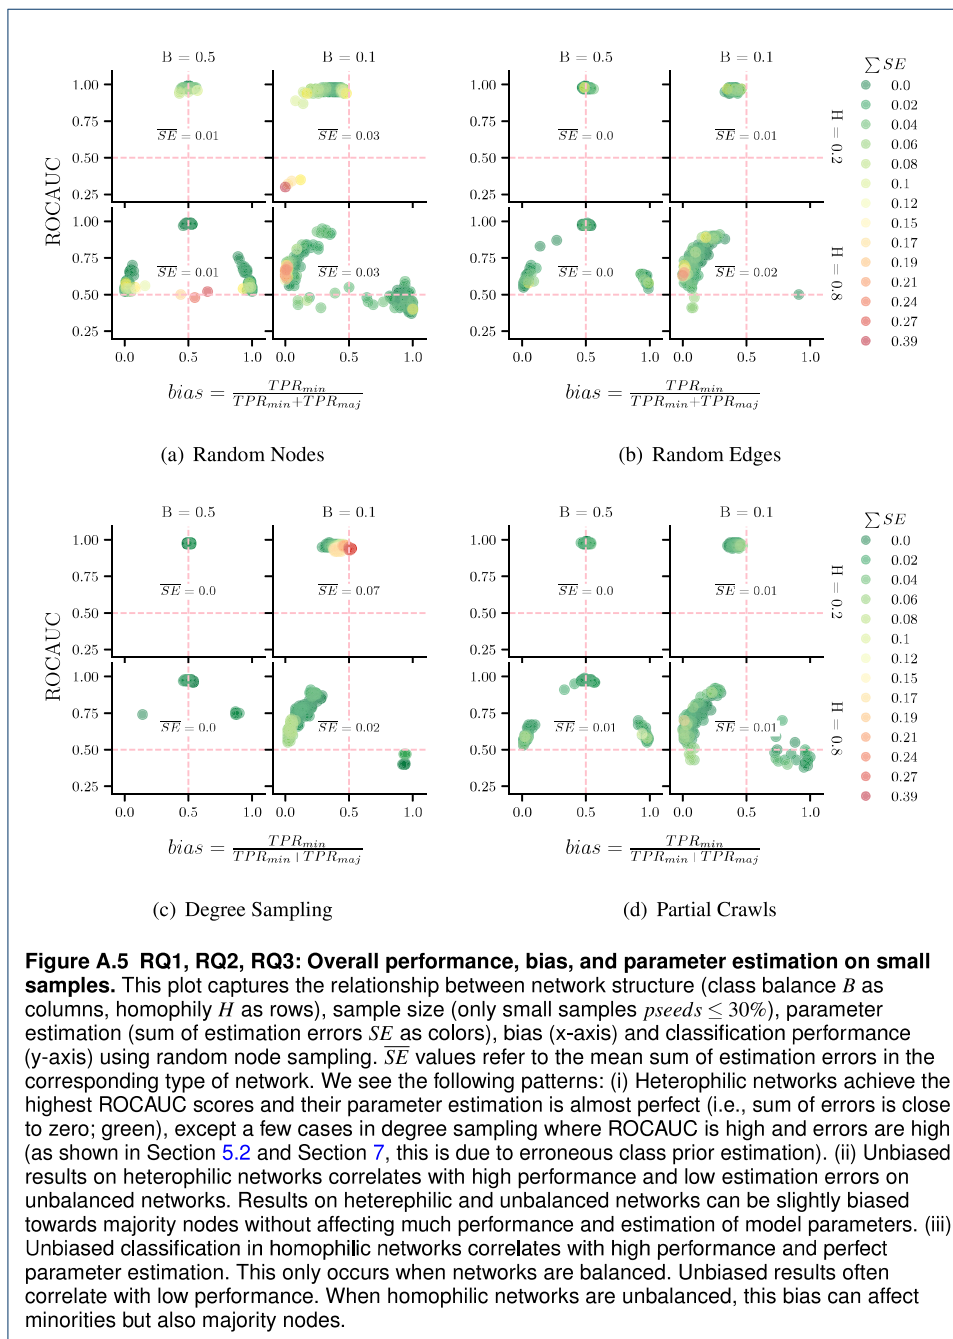

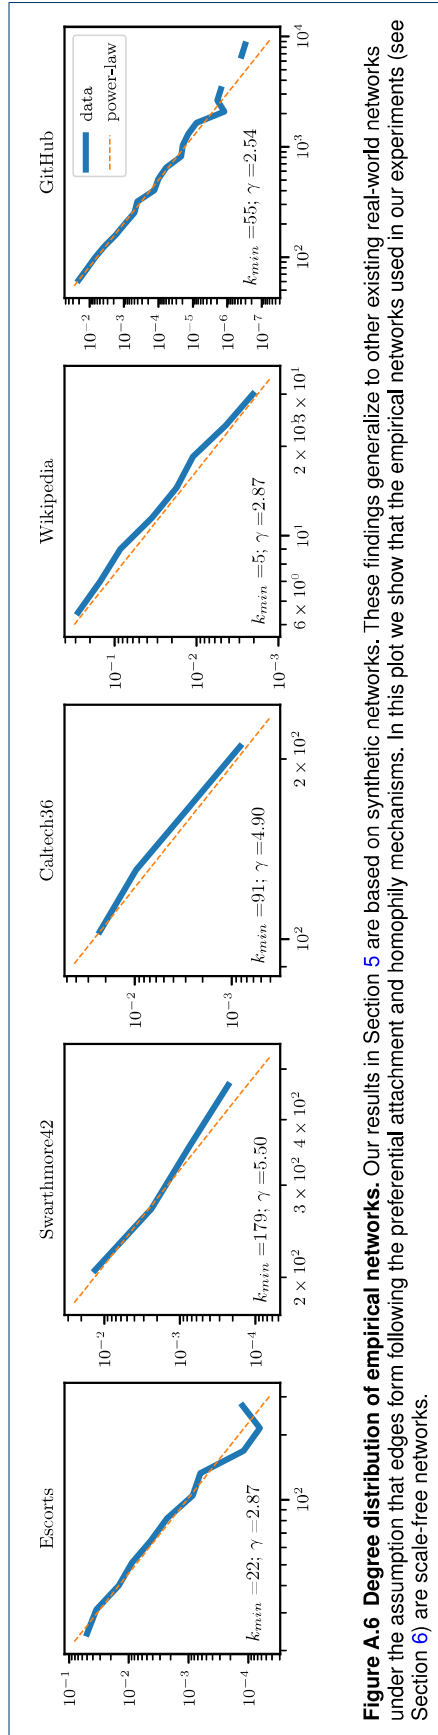

**Figure A.6 Degree distribution of empirical networks.** Our results in Section 5 are based on synthetic networks. These findings generalize to other existing real-world networks under the assumption that edges form following the preferential attachment and homophily mechanisms. In this plot we show that the empirical networks used in our experiments (see Section 6) are scale-free networks.
